# Supplementary material for: Acetogenic production of 3-Hydroxybutyrate using a native 3-Hydroxybutyryl-CoA Dehydrogenase
Source: Front Microbiol. 2022 Aug 8;13:948369. doi: 10.3389/fmicb.2022.948369 (PMC9393629; doi:10.3389/fmicb.2022.948369)
Supplement: Supplementary file 1 [file Table_1.XLSX]

## Sheet: Primers
Primers used in this study
Primer name	Sequences (5' -> 3')	Description	Source
fdx atob ctfAB_fwd	accatgattacgaattcgagGGCATTTTCAAAGAAATAACTAGTC	Universal forward primer for fdx promter, atob and ctfAB for the 3hbdh plasmids	This study
fdx atob _rev	ataatcaatcCTAAACAGCCATGGGTCTAAG	Universal reverse primer for fdx promter, atob and ctfAB for the 3hbdh plasmids	This study
Ppta_fwd	ggctgtttagGATTGATTATTTATTTTAAAATGCCTAAG	Universal forward primer for pta promter for the 3hbdh plasmids	This study
Ppta CLJU_C23220_rev	cagctttcatGTTCATTTCCTCCCTTTAAATTTAAC	Reverse primer for the pta promoter for CLJU_C23220	This study
CLJU_C23220_fwd	ggaaatgaacATGAAAGCTGTATTGTGG	Forward primer for CLJU_C23220	This study
CLJU_C23220_rev	gaggatccccgggtaccgagTTACAATAAGGATTTGTCAGG	Reverse primer for CLJU_C23220	This study
Ppta Cdiff native 3hbdh_rev	ccattttcatGTTCATTTCCTCCCTTTAAATTTAAC	Reverse primer for the pta promoter for Cdiff native 3hbdh	This study
Cdiff native 3hbdh_fwd	ggaaatgaacATGAAAATGGTTAAAGATAAAGTTG	Forward primer for Cdiff native 3hbdh	This study
Cdiff native 3hbdh_rev	gaggatccccgggtaccgagCTATTGTGCAGTATATCCTC	Reverse primer for Cdiff native 3hbdh	This study
Ppta Cdiff opt 3hbdh_rev	cttttaccatGTTCATTTCCTCCCTTTAAATTTAAC	Reverse primer for the pta promoter for Cdiff optimized 3hbdh	This study
Cdiff opt 3hbdh_fwd	ggaaatgaacATGGTAAAAGATAAAGTGGTATTC	Forward primer for Cdiff optimized 3hbdh	This study
Cdiff opt 3hbdh_rev	gaggatccccgggtaccgagCTACTGTGCTGTATATCC	Reverse primer for Cdiff optimized 3hbdh	This study
Ppta Rsph 3hbdh_rev	tcaaatccatGTTCATTTCCTCCCTTTAAATTTAAC	Reverse primer for the pta promoter for Rsph 3hbdh	This study
Rsph 3hbdh_fwd	ggaaatgaacATGGATTTGAAGGGTAAAAGGG	Forward primer for Rsph 3hbdh	This study
Rsph 3hbdh_rev	gaggatccccgggtaccgagAAGTGCTGTCCATCCACC	Reverse primer for Rsph 3hbdh	This study
Pfdx_uni_fwd	gctcggtacccggggatcctggcattttcaaagaaataactag	Universal forward primer for fdx promter	This study
Pfdx_Ckl hbd1+cac thl_rev	taatactcatcttatgtaacacctccttaatttttag	Reverse primer to amplify fdx promoter for the Ckl hbd1 + cac thl construct	This study
Ckl_hbd1_fwd	gttacataagatgagtattaaaagtgtagcg	Forward primer to amplify Ckl hbd1 to go with cac thl	This study
Ckl_hbd1_rev	cttctttcatTTAATAAGCGAAGAATCCTTTTC	Reverse primer to amplify Ckl hbd1 to go with cac thl	This study
Cac_thl_fwd	cgcttattaaATGAAAGAAGTTGTAATAGCTAG	Forward primer to amplify cac thl to go with Ckl hbd1	This study
Cac_thl_rev	atggacgcgtgacgtcgactCTAGCACTTTTCTAGCAATATTG	Reverse primer to amplify cac thl to go with Ckl hbd1	This study
Pfdx_Ckl hbd1_rev	taatactcatcttatgtaacacctccttaatttttag	Reverse primer to amplify fdx promoter for the Ckl hbd1 construct	This study
Ckl_hbd1 only_fwd	gttacataagatgagtattaaaagtgtagcg	Forward primer to amplify Ckl hbd1	This study
Ckl_hbd1 only_rev	atggacgcgtgacgtcgactttaataagcgaagaatccttttc	Reverse primer to amplify Ckl hbd1	This study
Pfdx_Ckl hbd2 only_rev	ttatatccatcttatgtaacacctccttaatttttag	Reverse primer to amplify fdx promoter for the Ckl hbd2 construct	This study
Ckl_hbd2 only_fwd	gttacataagatggatataaaaaatgtagctgtac	Forward primer to amplify Ckl hbd2	This study
Ckl_hbd2 only_rev5	atggacgcgtgacgtcgactttatatattcctttcaatggatttatc	Reverse primer to amplify Ckl hbd2	This study
Pfdxthl2_rev	catctttcatcttcatttgcttctattaaatctatatc	Reverse primer to amplify fdx promoter for the Ckl thl2 construct	This study
Ckl_Thl2_fwd4	gttacataagatgaaagatgcagttattgtaag	Forward primer to amplify Ckl thl2	This study
Ckl_Thl2_rev4	atggacgcgtgacgtcgactttatctttcaactattagtgcag	Reverse primer to amplify Ckl thl2	This study
Pfdx_Ckl thl2+hbd2_rev	catctttcatcttatgtaacacctccttaatttttag	Reverse primer to amplify fdx promoter for the Ckl thl2+hbd2 construct	This study
Ckl_Thl2_fwd4	gttacataagatgaaagatgcagttattgtaag	Forward primer to amplify Ckl thl2	This study
Ckl_Thl2_rev4	taatactcatttatctttcaactattagtgcag	Reverse primer to amplify Ckl thl2	This study
Ckl_hbd2_fwd	tgaaagataaatgagtattaaaagtgtagcg	Forward primer to amplify Ckl hbd2	This study
Ckl_hbd2_rev	atggacgcgtgacgtcgactttaataagcgaagaatccttttc	Reverse primer to amplify Ckl hbd2	This study
Pfdx_Cluhbd2_rev	ttatattcatcttatgtaacacctccttaatttttag	Reverse primer to amplify fdx promoter for the Clj Hbd2 construct	This study
CLJU hbd2_C37300_fwd	gttacataagatgaatataaagaacatagcagttttag	Forward primer to amplify Clj Hbd2	This study
CLJU hbd2_C37300_rev	atggacgcgtgacgtcgactttattttcccctagaatccc	Reverse primer to amplify Clj Hbd2	This study
pyrE KO_fwd	caggaaacagctatgaccgcatggataatttagttataaatacattgaaag	Forward primer to amplify 5' pyrE	This study
XJL.746.r	CTCGAATTCGTAATCATGGTCATTTATCCCCTTCTTATAGTCATATTTC	Reverse primer to amplify 5' pyrE	This study
XJL.737.f	ATGACCATGATTACGAATTCGAGGCATTTTCAAAGAAATAACTAG	Forward primer to amplify Pfdx	This study
XJL.785.r	CTGCATCTTTCATCTTATGTAACACCTCCTTAAT	Reverse primer to amplify Pfdx	This study
XJL.685.f	GTGTTACATAAGatgAAAAATTGTGTAATAGTATCAGC	Forward primer to amplify atoB	This study
XJL.690.r	CTTACCTCCTCCTCCTAATTGGATAttaATTTAATCTTTCTATTACCATAG	Reverse primer to amplify atoB	This study
XJL.691.f	TATCCAATTAGGAGGAGGAGGTAAGATGAACTCTAAAATAATTAGATTTG	Forward primer to amplify ctfAB	This study
XJL.751.r	AGGATCCCCGGGTACCGAGCTAAACAGCCATGGGTCTAAGTTC	Reverse primer to amplify ctfAB	This study
XJL.747.f	CTCGGTACCCGGGGATCCTCTAGGTCGAAAAAATCAATGCACGATGCAG	Forward primer to amplify 3' pyrE	This study
1200 bp DS pyrE	catggtcatatggatacagcggaacctgatgccgttaaataaac	Reverse primer to amplify 3' pyrE	This study
XJL.786.f	AGGTGTTACATAAGATGAAAGATGCAGTTATTGTAAGTGCA	Forward primer to amplify Ckl thl2	This study
XJL.787.r	CATgactaatcctcctctcTTATCTTTCAACTATTAGTGCAGTTC	Reverse primer to amplify Ckl thl2	This study
XJL.788.f	TAAgagaggaggattagtcATGAATATAAAGAACATAGCAG	Forward primer to amplify Clj hbd2	This study
XJL.791.r	CTAGAGGATCCCCGGGTACCGAGTTATTTTCCCCTAGAATCCCTC	Reverse primer to amplify Clj hbd2	This study
pyrE KO genome check_F	agaggaataatttaggaggacag	Forward primer for pyrE KO screen	This study
pyrE KO genome check_R	ACTATGGGAAGTTAAATCACCC	Reverse primer for pyrE KO screen	This study

## Sheet: Gene sequences
CLUJ_C23220	atgaaagctgtattgtggtatgataaaaaagatgtaagagtagaggaaattgaggaacctaaggtaaaagaaaatgctgtaaaaattaaagtgaaatggtgtggtatatgtggttctgacttgcatgagtatttaggaggacctatatttattccagtaggtacgccacatcctttaagcaagagtactgcaccagtagttttaggacatgagttttcaggagaagtagtagaaataggaagcaaggttacaaaatttaaagcaggagatagagttattgtagaacctatagttgcctgtggaaagtgtcctgcttgtcttgaaggaaaatataatttatgtgaagctttgggatttcatggactttgtggaagcggcggcggatttgctgaatacaca…
Cdiff native 3hbdh	ATGGTTAAAGATAAAGTTGTATTCGTAACAGGAGCTGCAAGTGGAATAGGTAAACAAATAGCTGAATCGTTCTTAAAAAATGGTGCTAAAGTAATGTTCTCTGATATAAATCAAGAAGCTTTAAATAATACCATAACAGAGTTACAAAAAAAAGGATATGATTGCATGAGTGTAAAGTGTGATGTAACTAAGGAAGAAGAAATTAACCACGCTATAGACAAAACTGTTGAAAAGTATGGCAGATTAGATATATTAATAAACAATGCTGGACTTCAACATGTTTCTATGATAGAAGATTTCCCAACTGATAAATTTGAATTTATGATAAAAATAATGCTGACAGCACCTTTTATAGCTACTAAAAAAGCATTTCCTATAATGAAAAAACAAGGCTTTGGT…
Cdiff optimized 3hbdh	ATGGTAAAAGATAAAGTGGTATTCGTGACTGGTGCAGCTAGCGGAATAGGAAAGCAGATTGCTGAATCTTTCTTAAAGAATGGTGCTAAGGTAATGTTTTCAGATATAAATCAGGAGGCATTAAATAACACTATTACAGAACTACAAAAAAAGGGTTATGACTGTATGAGCGTAAAATGTGACGTGACAAAAGAGGAGGAAATAAACCACGCAATTGACAAGACAGTAGAGAAGTATGGAAGGTTAGATATACTAATAAACAACGCAGGATTGCAGCACGTGTCAATGATAGAAGATTTCCCTACAGATAAATTTGAATTTATGATAAAGATAATGCTTACAGCACCATTTATTGCTACAAAAAAAGCATTCCCTATAATGAAGAAACAAGGATTTGGA…
Rsph	ATGGATTTGAAGGGTAAAAGGGCTATTGTAACAGGAAGCAACTCTGGTATAGGACTTGGATGTGCAGAAGAATTGGCAAGGGCTGGTGCAGAGGTGATAATTAATAGTTTCACAGATAGAGACGAGGATCACGCTCTAGCAGAGAAGATTGGTAGGGAACACGGAGTGCCATGTAGATACATAGCTGCAGATATGTCTAAGGGAGAGGAATGCAGGGCATTAGTAGAAAGAGCTGGTGGTTGTGATATATTGGTGAATAACGCTGGAATACAACACGTGGCTAGTATTGAGGAATTTCCTGCTGGTAAATGGGACGCTATTTTAGCTATTAACTTATCATCTGCTTTCCACACTACAGCAGCTGCATTACCAGGAATGAGAGCAGCAGGTTGGGGTAGA…
atoB	ATGAAAAATTGTGTAATAGTATCAGCAGTAAGAACTGCTATAGGATCTTTTAATGGATCATTAGCAAGTACTTCTGCTATAGATTTAGGAGCAACAGTAATAAAAGCAGCTATAGAAAGAGCTAAAATAGATAGTCAACATGTAGATGAAGTAATAATGGGAAATGTATTACAAGCAGGATTAGGACAAAATCCTGCTAGACAAGCATTACTTAAATCTGGATTAGCTGAAACTGTATGTGGATTTACAGTAAATAAAGTATGTGGAAGTGGACTTAAATCTGTAGCATTAGCAGCTCAAGCTATACAAGCAGGACAAGCTCAATCTATAGTAGCTGGAGGAATGGAAAATATGTCATTAGCTCCATATCTTCTTGATGCTAAAGCAAGAAGTGGATAT…
